# Supplementary material for: Interfacial anomaly in low global warming potential refrigerant blends as predicted by molecular dynamics simulations
Source: Royal Society of Chemistry journal article supplement (doi:10.1039/c9cp03231b), 2019-01-01
Supplement: c9cp03231b1.pdf [file c9cp03231b1.pdf]

## Supplementary Information

### Interfacial Anomaly in Low Global Warming Potential Refrigerant Blends as Predicted by Molecular Dynamics Simulations

Yuting Li,<sup>a</sup> Wael A. Fouad<sup>b</sup> and Lourdes F. Vega<sup>\*a,c</sup>

<sup>a</sup>Chemical Engineering Department, Khalifa University. PO Box 127788. Abu Dhabi, United Arab Emirates.

<sup>b</sup>Department of Chemical Engineering, King Fahd University of Petroleum and Minerals, Dhahran 31261, Saudi Arabia

<sup>c</sup>Research and Innovation Center on CO<sub>2</sub> and H<sub>2</sub> (RICH) and Center for Catalysis and Separation (CeCaS), Khalifa University, PO Box 127788. Abu Dhabi, United Arab Emirates.

**Table 1.** Force field parameters used for HFO-1234yf, HFO-1234ze (E) and HC-600a

|                | Force      | Force Constant                     |              | REF |
|----------------|------------|------------------------------------|--------------|-----|
|                | Atom Types | $\epsilon$ (kcal/mol)              | $\sigma$ (Å) |     |
| HFO-1234yf     | FCT        | 0.056                              | 2.94         | [1] |
|                | FCM        | 0.056                              | 2.9          |     |
|                | CT         | 0.074                              | 3.4          |     |
|                | CM         | 0.098                              | 3.4          |     |
|                | HC         | 0.016                              | 2.65         |     |
|                | H1         | 0.016                              | 2.47         |     |
| HFO-1234ze (E) | FCT        | 0.05645                            | 2.94         | [2] |
|                | FCM        | 0.05645                            | 2.9          |     |
|                | CT         | 0.07431                            | 3.4          |     |
|                | CM         | 0.09799                            | 3.4          |     |
|                | HC         | 0.0157                             | 2.65         |     |
|                | H1         | 0.0157                             | 2.47         |     |
| HC-600a        | CT         | 0.066                              | 3.5          | [3] |
|                | HC         | 0.03                               | 2.5          |     |
|                | Bond       | $k_r$ (kcal/(mol·Å <sup>2</sup> )) | $r_0$ (Å)    |     |
| HFO-1234yf     | CM=CM      | 676.79                             | 1.331        | [1] |
|                | CM-CT      | 317.6                              | 1.511        |     |
|                | CT-FCT     | 369.17                             | 1.353        |     |
|                | CM-HC      | 388.88                             | 1.086        |     |
|                | CM-FCM     | 445.68                             | 1.33         |     |
| HFO-1234ze (E) | FCT-CT     | 369.17065                          | 1.353        | [2] |
|                | FCM-CM     | 445.68117                          | 1.33         |     |
|                | CT-CM      | 317.60038                          | 1.511        |     |

|                |            |                                             |                  |     |
|----------------|------------|---------------------------------------------|------------------|-----|
|                | CM=CM      | 676.79015                                   | 1.331            |     |
|                | CM-HC/H1   | 388.87906                                   | 1.086            |     |
| HC-600a        | CT-CT      | 268                                         | 1.529            | [3] |
|                | CT-HC      | 340                                         | 1.09             |     |
|                | Angle      | $k_{\theta}$ (kcal/(mol·rad <sup>2</sup> )) | $\theta_0$ (deg) |     |
| HFO-1234yf     | HC-CM=CM   | 36.35                                       | 120.6            | [1] |
|                | FCT-CT-FCT | 87.86                                       | 107.5            |     |
|                | CM-CT-FCT  | 74.85                                       | 111.3            |     |
|                | HC-CM-HC   | 29.31                                       | 118.7            |     |
|                | CM=CM-FCM  | 50.52                                       | 122.6            |     |
|                | FCM-CM-CT  | 76.38                                       | 112.5            |     |
|                | CM=CM-CT   | 50.12                                       | 124.1            |     |
| HFO-1234ze (E) | FCT-CT-FCT | 87.861                                      | 107.5            | [2] |
|                | FCT-CT-CM  | 74.84951                                    | 111.3            |     |
|                | CT-CM=CM   | 50.1195                                     | 124.1            |     |
|                | CT-CM-HC   | 32.33034                                    | 115.1            |     |
|                | CM=CM-HC   | 36.35042                                    | 120.6            |     |
|                | FCM-CM=CM  | 50.52109                                    | 122.6            |     |
|                | FCM-CM-H1  | 51.23333                                    | 113.7            |     |
| HC-600a        | CT-CT-HC   | 37.5                                        | 110.7            | [3] |
|                | HC-CT-HC   | 33                                          | 107.8            |     |

**Table 2.** Force field parameters used for the dihedral potential of HFO-1234yf, HFO-1234ze (E)

|                | Dihedral      | $k_x$   | n | $\sigma$ (deg) | REF |
|----------------|---------------|---------|---|----------------|-----|
| HFO-1234yf     | FCT-CT-CM-FCM | 0.25    | 3 | 0              | [1] |
|                | FCT-CT-CM=CM  | 0.14    | 3 | 180            |     |
|                | FCM-CM=CM-HC  | 6.65    | 2 | 180            |     |
|                | CT-CM=CM-HC   | 6.65    | 2 | 180            |     |
|                | FCM-CM=CM-HC  | 6.65    | 1 | 180            |     |
|                | HC-CM=CM-H1   | 6.65    | 1 | 0              |     |
| HFO-1234ze (E) | FCT-CT-CM=CM  | 0.14223 | 3 | 0              | [2] |
|                | FCT-CT-CM-HC  | 0.17806 | 3 | 180            |     |
|                | FCM-CM=CM-CT  | 6.65392 | 1 | 180            |     |
|                | CT-CM=CM-H1   | 6.65392 | 1 | 0              |     |
|                | FCM-CM=CM-HC  | 6.65392 | 1 | 180            |     |
|                | HC-CM=CM-H1   | 6.65392 | 1 | 0              |     |

**Table 3.** Force field parameters used in this work for the dihedral potential of HC-600a

|         | Dihedral    | K1 | K2 | K3    | K4 | REF |
|---------|-------------|----|----|-------|----|-----|
| HC-600a | CT-CT-CT-HC | 0  | 0  | 0.366 | 0  | [3] |
|         | HC-CT-CT-HC | 0  | 0  | 0.318 | 0  |     |

**Table 4.** Partial Charges of HFO-1234yf and HFO-1234ze (E) used in this work [3]

| HFO-1234yf |             | HFO-1234ze (E) |             |
|------------|-------------|----------------|-------------|
| Type       | $q$ ( $e$ ) | Type           | $q$ ( $e$ ) |
| FCT        | -0.212      | FCT            | -0.24329    |
| FCM        | -0.1825     | FCM            | -0.19161    |
| CT         | 0.6306      | CT             | 0.77614     |
| CM         | 0.1974      | CM             | -0.48504    |
| CM         | -0.4191     | CM             | 0.25325     |
| HC         | 0.2048      | HC             | 0.24464     |
| HC         | 0.2048      | HC             | 0.13249     |

**Table 5.** MD simulation results of pure HFO-1234yf: saturated densities, surface tension and interface thickness, with their corresponding standard deviation (SD).

| T/K    | $\rho_l/\text{kg}\cdot\text{m}^{-3}$ | $\rho_g/\text{kg}\cdot\text{m}^{-3}$ | $\gamma/\text{mN}\cdot\text{m}^{-1}$ | $d/\text{\AA}$ |
|--------|--------------------------------------|--------------------------------------|--------------------------------------|----------------|
| 253.15 | 1235.8±2.2                           | 6.5±1.2                              | 11.61±0.09                           | 6.21±0.07      |
| 263.15 | 1203.6±2.7                           | 10.6±0.6                             | 10.7±0.3                             | 4.91±0.02      |
| 273.15 | 1174.2±1.9                           | 20.1±0.5                             | 8.9±0.2                              | 5.42±0.03      |
| 283.15 | 1134.0±1.1                           | 28.0±0.6                             | 7.7±0.1                              | 5.97±0.04      |
| 293.15 | 1096.7±2.9                           | 34.3±0.5                             | 6.9±0.4                              | 6.55±0.05      |
| 303.15 | 1059.6±1.2                           | 39.2±0.7                             | 5.9±0.2                              | 7.14±0.05      |
| 313.15 | 1023.1±1.9                           | 62.8±0.7                             | 4.5±0.1                              | 8.99±0.07      |
| 323.15 | 966.2±1.5                            | 72.9±0.8                             | 3.5±0.2                              | 10.71±0.09     |
| 333.15 | 918.7±2.0                            | 96.4±1.1                             | 2.6±0.2                              | 12.4±0.1       |
| 343.15 | 880.5±1.9                            | 125.7±1.0                            | 1.6±0.3                              | 13.5±0.1       |

**Table 6.** MD simulation results of pure HFO-1234ze (E): saturated densities, surface tension and interface thickness, with their corresponding standard deviation (SD).

| T/K    | $\rho_l/\text{kg}\cdot\text{m}^{-3}$ | $\rho_g/\text{kg}\cdot\text{m}^{-3}$ | $\gamma/\text{mN}\cdot\text{m}^{-1}$ | $d(\text{\AA})$ |
|--------|--------------------------------------|--------------------------------------|--------------------------------------|-----------------|
| 253.15 | 1311.44±1.1                          | 6.3±0.5                              | 14.15±0.05                           | 3.83±0.02       |
| 263.15 | 1288.8±1.7                           | 8.5±0.7                              | 12.87±0.07                           | 5.82±0.04       |
| 273.15 | 1246.67±1.4                          | 12.0±0.4                             | 11.6±0.2                             | 6.40±0.05       |
| 283.15 | 1234.9±2.0                           | 16.5±0.8                             | 9.9±0.3                              | 7.07±0.05       |
| 293.15 | 1175.0±1.6                           | 28.7±0.6                             | 9.1±0.1                              | 7.69±0.02       |
| 303.15 | 1150.6±2.2                           | 33.6±0.8                             | 8.1±0.2                              | 8.38±0.06       |
| 313.15 | 1104.1±2.4                           | 50.0±0.1                             | 6.5±0.1                              | 8.63±0.04       |
| 323.15 | 1071.1±1.5                           | 55.5±0.5                             | 5.9±0.2                              | 8.84±0.05       |
| 333.15 | 1033.2±3.4                           | 80.2±1.2                             | 4.3±0.1                              | 8.92±0.07       |
| 343.15 | 963.6±8.2                            | 102.9±2.6                            | 3.4±0.1                              | 9.2±0.3         |

**Table 7.** MD simulation results of pure HC-600a: saturated densities, surface tension and interface thickness, with their corresponding standard deviation (SD).

| T/K    | $\rho_l/\text{kg}\cdot\text{m}^{-3}$ | $\rho_g/\text{kg}\cdot\text{m}^{-3}$ | $\gamma/\text{mN}\cdot\text{m}^{-1}$ | $d(\text{\AA})$ |
|--------|--------------------------------------|--------------------------------------|--------------------------------------|-----------------|
| 253.15 | 617.5±0.4                            | 2.4±0.3                              | 15.0±0.2                             | 5.05±0.02       |
| 263.15 | 610.1±0.5                            | 3.8±0.3                              | 14.2±0.5                             | 5.19±0.03       |
| 273.15 | 587.1±0.6                            | 6.5±0.6                              | 12.6±0.2                             | 5.35±0.02       |
| 283.15 | 579.2±0.5                            | 7.6±0.4                              | 11.5±0.4                             | 5.64±0.06       |
| 293.15 | 565.4±0.3                            | 8.9±0.3                              | 10.4±0.4                             | 5.72±0.02       |
| 303.15 | 552.4±0.5                            | 14.6±0.3                             | 9.5±0.3                              | 5.81±0.04       |
| 313.15 | 531.9±0.3                            | 19.7±0.6                             | 8.5±0.4                              | 7.02±0.03       |
| 323.15 | 517.1±0.3                            | 24.5±0.4                             | 7.2±0.1                              | 8.13±0.05       |
| 333.15 | 501.4±0.5                            | 25.2±0.3                             | 6.4±0.3                              | 9.44±0.05       |

**Table 8.** MD simulation results for the binary mixture HFO-1234yf+HC-600a: liquid mole fractions of HC-600a ( $x_1$ ), vapor mole fractions of HC-600a ( $y_1$ ), vapor pressure (P), surface tension ( $\gamma$ ) and their corresponding standard derivation (SD) at different temperatures and different initial compositions (HC-600a) in the simulation box.

|         | Initial composition HC | $x_1$  | $y_1$  | P(MPa)    | $\gamma$ (mN/m) |
|---------|------------------------|--------|--------|-----------|-----------------|
| 283.15K | 0                      | 0      | 0      | 0.44±0.07 | 7.73±0.08       |
|         | 0.1                    | 0.0991 | 0.0909 | 0.44±0.01 | 7.6±0.1         |
|         | 0.14                   | 0.0984 | 0.0952 | 0.45±0.04 | 7.6±0.3         |
|         | 0.3                    | 0.326  | 0.156  | 0.44±0.04 | 8.0±0.4         |
|         | 0.5                    | 0.483  | 0.351  | 0.42±0.03 | 8.7±0.1         |
|         | 0.7                    | 0.725  | 0.565  | 0.4±0.1   | 9.4±0.3         |
|         | 0.9                    | 0.912  | 0.737  | 0.29±0.02 | 10.6±0.6        |
|         | 1                      | 1      | 1      | 0.22±0.03 | 11.5±0.2        |
| 293.15K | 0                      | 0      | 0.140  | 0.59±0.05 | 6.9±0.1         |
|         | 0.1                    | 0.0970 | 0.138  | 0.60±0.03 | 6.8±0.1         |
|         | 0.3                    | 0.297  | 0.336  | 0.59±0.06 | 7.9±0.2         |
|         | 0.5                    | 0.512  | 0.408  | 0.56±0.03 | 8.6±0.3         |
|         | 0.7                    | 0.785  | 0.655  | 0.5±0.1   | 8.1±0.6         |
|         | 0.9                    | 0.970  | 0.913  | 0.3±0.1   | 9.3±0.7         |
|         | 1                      | 1      | 1      | 0.31±0.01 | 10.37±0.09      |

**Table 9.** MD simulation results for the binary mixture HFO-1234ze (E) + HC-600a: liquid mole fractions of HC-600a ( $x_1$ ), vapor mole fractions of HC-600a ( $y_1$ ), vapor pressure ( $P$ ), surface tension ( $\gamma$ ) and their corresponding standard derivation (SD) at different temperatures and different initial compositions (HC-600a) in the simulation box.

|         | Initial composition HC | $x_1$  | $y_1$  | $P$ (MPa) | $\gamma$ (mN/m) |
|---------|------------------------|--------|--------|-----------|-----------------|
| 268.15K | 0                      | 0      | 0      | 0.18±0.02 | 12.79±0.09      |
|         | 0.1                    | 0.0939 | 0.0131 | 0.19±0.02 | 12.4±0.4        |
|         | 0.3                    | 0.294  | 0.403  | 0.21±0.04 | 11.7±0.3        |
|         | 0.455                  | 0.451  | 0.448  | 0.21±0.02 | 11.6±0.1        |
|         | 0.7                    | 0.715  | 0.494  | 0.20±0.03 | 11.8±0.2        |
|         | 0.9                    | 0.912  | 0.668  | 0.17±0.04 | 12.5±0.6        |
|         | 1                      | 1      | 1      | 0.13±0.01 | 12.98±0.07      |
| 288.15K | 0                      | 0      | 0      | 0.37±0.03 | 10.1±0.1        |
|         | 0.1                    | 0.0990 | 0.112  | 0.39±0.02 | 9.6±0.4         |
|         | 0.3                    | 0.295  | 0.348  | 0.46±0.02 | 9.2±0.2         |
|         | 0.408                  | 0.405  | 0.413  | 0.41±0.01 | 9.1±0.2         |
|         | 0.7                    | 0.715  | 0.562  | 0.38±0.02 | 9.7±0.5         |
|         | 0.9                    | 0.903  | 0.837  | 0.32±0.04 | 10.48±0.8       |
|         | 1                      | 1      | 1      | 0.26±0.03 | 11.1±0.2        |

## References

- [1] G. Raabe and E. J. Maginn, "A force field for 3, 3, 3-fluoro-1-propenes, including HFO-1234yf," *The Journal of Physical Chemistry B*, vol. 114, pp. 10133-10142, 2010.
- [2] G. Raabe, "Molecular modeling of fluoropropene refrigerants," *The Journal of Physical Chemistry B*, vol. 116, pp. 5744-5751, 2012.
- [3] W. L. Jorgensen, D. S. Maxwell, and J. Tirado-Rives, "Development and Testing of the OPLS All-Atom Force Field on Conformational Energetics and Properties of Organic Liquids," *Journal of the American Chemical Society*, vol. 118, pp. 11225-11236, 1996/01/01 1996.
